# Supplementary figures and images for: The Role of IAA in Regulating Root Architecture of Sweetpotato (Ipomoea batatas [L.] Lam) in Response to Potassium Deficiency Stress
Source: MDPI journal article supplement (doi:10.3390/plants12091779), 2023-04-26

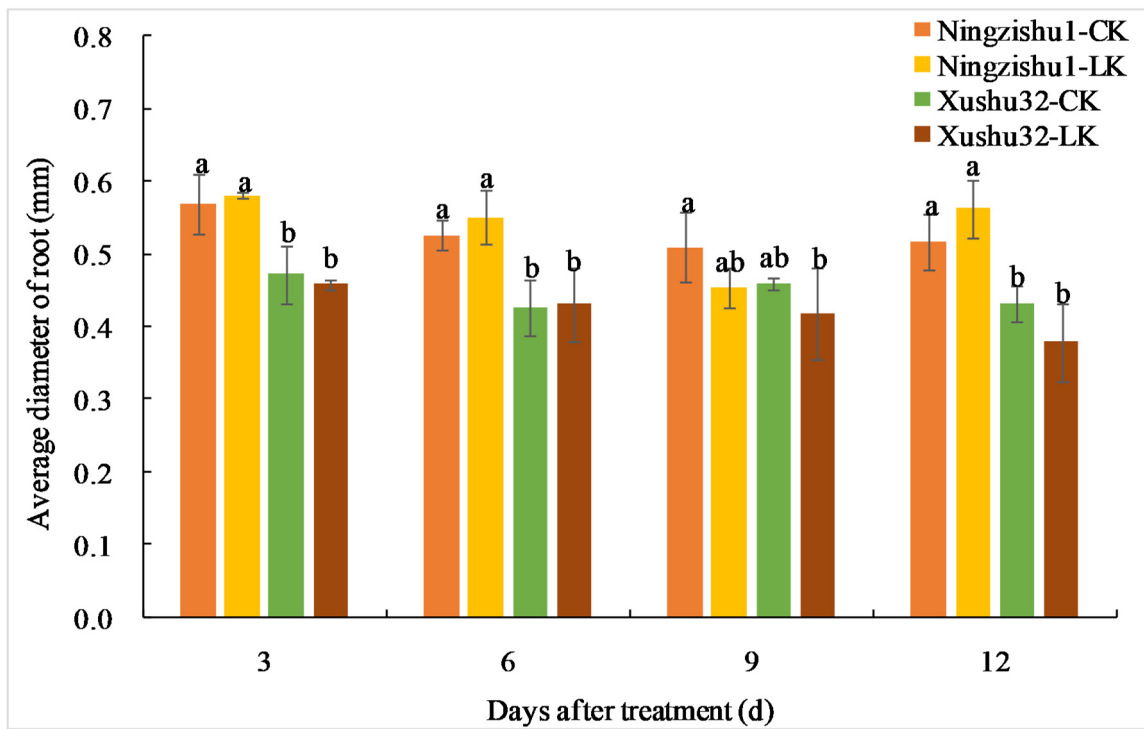

Figure S1. Root diameter of different sweetpotato varieties under different  $K^+$  treatments.

Supplement: s1 [file s1]
